# Supplementary material
Source: HighWire-hosted journal article supplement (https://erj.ersjournals.com/content/54/3/1900596)
Supplement: inline-supplementary-material-1 [file inline-supplementary-material-1.pdf]

## SUPPLEMENTARY TABLE

**Table S1** Descriptive analysis of the percentage of hardcore and light smokers among the sample in total and by age, sex, difficulties to pay the bills, marital status, age when stopped full-time education and type of community.

|                                      | Current smokers |                  |           |               |           |
|--------------------------------------|-----------------|------------------|-----------|---------------|-----------|
|                                      | Total           | Hardcore smokers |           | Light smokers |           |
|                                      | (N=112,745)     | N                | Freq. (%) | N             | Freq. (%) |
| Total                                | 29,010          | 12,711           | 43.82%    | 4,265         | 14.70%    |
| Age                                  |                 |                  |           |               |           |
| 15-24                                | 3,513           | 954              | 27.16%    | 815           | 23.20%    |
| 25-34                                | 5,558           | 2,224            | 40.01%    | 873           | 15.71%    |
| 35-44                                | 5,984           | 2,803            | 46.84%    | 758           | 12.67%    |
| 45-54                                | 6,067           | 3,069            | 50.59%    | 742           | 12.23%    |
| 55-64                                | 4,854           | 2,396            | 49.36%    | 598           | 12.32%    |
| 65+                                  | 3,034           | 1,265            | 41.69%    | 479           | 15.79%    |
| Sex                                  |                 |                  |           |               |           |
| Men                                  | 15,577          | 7,871            | 50.53%    | 1,731         | 11.11%    |
| Women                                | 13,433          | 4,840            | 36.03%    | 2,534         | 18.86%    |
| Difficulties to pay bills            |                 |                  |           |               |           |
| Low                                  | 4,935           | 2,373            | 48.09%    | 521           | 10.56%    |
| Middle-Low                           | 9,408           | 4,399            | 46.76%    | 1,167         | 12.40%    |
| Middle-High                          | 14,185          | 5,732            | 40.41%    | 2,506         | 17.67%    |
| Marital status                       |                 |                  |           |               |           |
| Married <sup>1</sup>                 | 17,647          | 8,060            | 45.67%    | 2,426         | 13.75%    |
| Single                               | 6,283           | 2,377            | 37.83%    | 1,127         | 17.94%    |
| Divorced <sup>2</sup>                | 4,662           | 2,151            | 46.14%    | 634           | 13.60%    |
| Other                                | 368             | 103              | 27.99%    | 73            | 19.84%    |
| Age when stopped full-time education |                 |                  |           |               |           |
| Up to 15 years                       | 4,589           | 2,319            | 50.53%    | 483           | 10.53%    |
| 16 to 19 years                       | 15,490          | 7,218            | 46.60%    | 1,960         | 12.65%    |
| 20+ years                            | 7,573           | 2,792            | 36.87%    | 1,502         | 19.83%    |
| Type of community                    |                 |                  |           |               |           |
| Rural area or village                | 9,283           | 4,147            | 44.67%    | 1,291         | 13.91%    |
| Small-middle town                    | 10,756          | 4,540            | 42.21%    | 1,639         | 15.24%    |
| Large town                           | 8,927           | 3,995            | 44.75%    | 1,331         | 14.91%    |

<sup>1</sup>Or living with a partner

<sup>2</sup>Or separated or widow
